# Supplementary material
Source: publisher site journal article supplement (https://www.spandidos-publications.com/2493/downloadSupplementary)
Supplement: Supplementary file 1 [file downloadSupplementary]

## Sheet: corResult
Table SIII. Regulatory correlations between survival-associated AS events and SF genes. AS, alternative splicing; SF, splicing factor; AA, alternate acceptor; AD, alternate donor; AP, alternate promoter; AT, alternate terminator; ES, exon skipping; ME, mutually exclusive exon; RI, retained intron.
SF	AS	Correlation	P-value	P-value	Regulation
HSPB1	LMF1-33029-AP	-0.516252	3.520*10^-11	3.52e-11	negative
HSPB1	LMF1-33028-AP	0.516252	3.520*10^-11	3.52e-11	postive
TIA1	NAA38-81579-RI	0.578641	3.060*10^-14	3.06e-14	postive
TIA1	ACOT11-3146-AT	-0.529679	8.710*10^-12	8.71e-12	negative
TIA1	ACOT11-3145-AT	0.529671	8.720*10^-12	8.72e-12	postive
TIA1	PSMG4-75172-AT	-0.512161	5.330*10^-11	5.33e-11	negative
TIA1	DNAJC2-81185-AT	-0.57663	3.930*10^-14	3.93e-14	negative
TIA1	NSUN5-79935-RI	0.562759	2.120*10^-13	2.12e-13	postive
TIAL1	NAA38-81579-RI	0.500308	1.710*10^-10	1.71e-10	postive
TIAL1	ZSCAN18-52401-AT	-0.516785	3.340*10^-11	3.34e-11	negative
TIAL1	CFI-70339-AT	-0.532741	6.280*10^-12	6.28e-12	negative
PRMT5	MRPS21-7461-AP	0.510162	6.510*10^-11	6.51e-11	postive
PRMT5	MRPS21-7460-AP	-0.510162	6.510*10^-11	6.51e-11	negative
PRMT5	ZNF333-48020-AT	0.56054	2.750*10^-13	2.75e-13	postive
PRMT5	CRTC1-106128-ES	-0.553204	6.460*10^-13	6.46e-13	negative
PQBP1	FAM13A-69905-AT	0.55237	7.110*10^-13	7.11e-13	postive
PQBP1	SLC25A23-47039-AT	0.528049	1.040*10^-11	1.04e-11	postive
PQBP1	SLC25A23-47037-AT	-0.518676	2.750*10^-11	2.75e-11	negative
PQBP1	FAM13A-69904-AP	-0.533787	5.610*10^-12	5.61e-12	negative
PQBP1	BTN2A1-75668-AT	0.542992	2.050*10^-12	2.05e-12	postive
PQBP1	BTN2A1-75669-AT	-0.542992	2.050*10^-12	2.05e-12	negative
PQBP1	FAM13A-69903-AP	0.535406	4.710*10^-12	4.71e-12	postive
PQBP1	FAM13A-69906-AT	-0.615807	2.140*10^-16	2.14e-16	negative
PQBP1	SDR39U1-27009-AA	-0.591444	5.940*10^-15	5.94e-15	negative
PQBP1	COX11-42568-AA	-0.531677	7.040*10^-12	7.04e-12	negative
PQBP1	NSUN5-97503-ES	-0.524556	1.500*10^-11	1.5e-11	negative
EEF1A1	BTN2A1-75668-AT	0.517412	3.130*10^-11	3.13e-11	postive
EEF1A1	BTN2A1-75669-AT	-0.517412	3.130*10^-11	3.13e-11	negative
EEF1A1	FAM13A-69906-AT	-0.524781	1.460*10^-11	1.46e-11	negative
EEF1A1	CHCHD3-81833-AT	-0.567582	1.190*10^-13	1.19e-13	negative
EEF1A1	CHCHD3-81834-AT	0.574234	5.290*10^-14	5.29e-14	postive
HNRNPC	FAM13A-69905-AT	0.566092	1.420*10^-13	1.42e-13	postive
HNRNPC	FAM13A-69906-AT	-0.577399	3.570*10^-14	3.57e-14	negative
SEC31B	DENND2A-82009-AT	-0.600244	1.850*10^-15	1.85e-15	negative
SEC31B	ERCC5-26230-RI	0.501111	1.590*10^-10	1.59e-10	postive
SEC31B	NAA38-81579-RI	0.669509	4.570*10^-20	4.57e-20	postive
SEC31B	UBE2C-59609-RI	0.587285	1.020*10^-14	1.02e-14	postive
SEC31B	ARHGEF4-55357-RI	0.515228	3.910*10^-11	3.91e-11	postive
SEC31B	LMF1-33029-AP	0.533062	6.070*10^-12	6.07e-12	postive
SEC31B	LMF1-33028-AP	-0.533062	6.070*10^-12	6.07e-12	negative
SEC31B	GABARAPL1-20353-AT	-0.570238	8.620*10^-14	8.62e-14	negative
SEC31B	RPGR-88807-ES	0.515762	3.700*10^-11	3.7e-11	postive
SEC31B	CD276-31611-AT	-0.734792	1.040*10^-25	1.04e-25	negative
SEC31B	CBR4-71137-AT	-0.530147	8.290*10^-12	8.29e-12	negative
SEC31B	WDR33-55244-AT	-0.574367	5.200*10^-14	5.2e-14	negative
SEC31B	ZNF83-51506-ES	0.543328	1.970*10^-12	1.97e-12	postive
SEC31B	PABPN1-26731-RI	0.591098	6.210*10^-15	6.21e-15	postive
SEC31B	SLC37A3-81987-AA	0.503939	1.200*10^-10	1.2e-10	postive
SEC31B	HEXA-31540-AT	-0.661086	1.930*10^-19	1.93e-19	negative
SEC31B	AKR1C2-10650-AT	0.502129	1.440*10^-10	1.44e-10	postive
SEC31B	ANKS3-33795-AT	-0.56749	1.200*10^-13	1.2e-13	negative
SEC31B	ANKS3-33799-AT	0.567478	1.200*10^-13	1.2e-13	postive
SEC31B	DNAJC2-81185-AT	-0.552432	7.060*10^-13	7.06e-13	negative
SEC31B	RANBP1-61138-RI	0.706855	4.180*10^-23	4.18e-23	postive
SEC31B	NSUN5-79935-RI	0.586257	1.160*10^-14	1.16e-14	postive
SEC31B	RNF146-77446-AT	-0.62379	6.740*10^-17	6.74e-17	negative
SEC31B	UNC119-39915-RI	0.524546	1.500*10^-11	1.5e-11	postive
SEC31B	AGTRAP-670-AA	0.552041	7.390*10^-13	7.39e-13	postive
SEC31B	HSPB11-3097-AT	-0.564378	1.750*10^-13	1.75e-13	negative
SEC31B	FLAD1-91160-ES	0.562474	2.190*10^-13	2.19e-13	postive
SEC31B	TMEM138-16186-AT	-0.736974	6.310*10^-26	6.31e-26	negative
SEC31B	TMEM138-16187-AT	0.736981	6.300*10^-26	6.3e-26	postive
SEC31B	GTF2IRD2-80092-AT	-0.531806	6.940*10^-12	6.94e-12	negative
SEC31B	RAB3GAP1-55429-AT	-0.560482	2.770*10^-13	2.77e-13	negative
SEC31B	OCIAD1-69238-AD	0.514879	4.050*10^-11	4.05e-11	postive
SEC31B	TBC1D7-75375-AT	-0.592932	4.890*10^-15	4.89e-15	negative
SEC31B	TMEM161B-72738-RI	0.633109	1.680*10^-17	1.68e-17	postive
SNRNP40	FAM13A-69906-AT	-0.521044	2.150*10^-11	2.15e-11	negative
SNRPB	FAM13A-69905-AT	0.616934	1.820*10^-16	1.82e-16	postive
SNRPB	SLC25A23-47039-AT	0.531576	7.120*10^-12	7.12e-12	postive
SNRPB	SLC25A23-47037-AT	-0.528693	9.680*10^-12	9.68e-12	negative
SNRPB	FAM13A-69904-AP	-0.513839	4.500*10^-11	4.5e-11	negative
SNRPB	BTN2A1-75668-AT	0.603965	1.110*10^-15	1.11e-15	postive
SNRPB	BTN2A1-75669-AT	-0.603965	1.110*10^-15	1.11e-15	negative
SNRPB	FAM13A-69903-AP	0.519049	2.650*10^-11	2.65e-11	postive
SNRPB	FAM13A-69906-AT	-0.657652	3.420*10^-19	3.42e-19	negative
SNRPB	BTN2A2-75642-AA	-0.522129	1.930*10^-11	1.93e-11	negative
SNRPB	NSUN5-97503-ES	-0.542784	2.100*10^-12	2.1e-12	negative
SNRPB	DYNLT3-88789-AT	-0.579309	2.810*10^-14	2.81e-14	negative
ILF2	FAM13A-69905-AT	0.650716	1.070*10^-18	1.07e-18	postive
ILF2	FAM13A-69906-AT	-0.664703	1.040*10^-19	1.04e-19	negative
LSM6	CD58-4361-AT	0.508591	7.610*10^-11	7.61e-11	postive
LSM2	FAM13A-69905-AT	0.636215	1.050*10^-17	1.05e-17	postive
LSM2	SLC25A23-47039-AT	0.563179	2.010*10^-13	2.01e-13	postive
LSM2	SLC25A23-47037-AT	-0.566722	1.320*10^-13	1.32e-13	negative
LSM2	FAM13A-69904-AP	-0.509771	6.770*10^-11	6.77e-11	negative
LSM2	BTN2A1-75668-AT	0.644567	2.850*10^-18	2.85e-18	postive
LSM2	BTN2A1-75669-AT	-0.644567	2.850*10^-18	2.85e-18	negative
LSM2	FAM13A-69903-AP	0.509137	7.210*10^-11	7.21e-11	postive
LSM2	FAM13A-69906-AT	-0.688673	1.440*10^-21	1.44e-21	negative
LSM2	NCKIPSD-64731-AT	-0.565976	1.440*10^-13	1.44e-13	negative
LSM2	GALNT4-23640-AP	-0.539755	2.930*10^-12	2.93e-12	negative
LSM2	GALNT4-23641-AP	0.530956	7.610*10^-12	7.61e-12	postive
HNRNPL	COX11-42567-RI	-0.509187	7.170*10^-11	7.17e-11	negative
HNRNPL	ZNF333-48020-AT	0.532134	6.700*10^-12	6.7e-12	postive
HNRNPL	ZNF333-48017-AT	-0.538653	3.310*10^-12	3.31e-12	negative
HNRNPL	PDCD5-48878-AP	-0.606038	8.380*10^-16	8.38e-16	negative
HNRNPL	PDCD5-48877-AP	0.606038	8.380*10^-16	8.38e-16	postive
HNRNPL	MAD2L2-665-ES	-0.584715	1.420*10^-14	1.42e-14	negative
HNRNPL	SH3BP1-62132-AT	0.504825	1.100*10^-10	1.1e-10	postive
HNRNPL	SH3BP1-62134-AT	-0.504825	1.100*10^-10	1.1e-10	negative
HNRNPL	GK-88735-ES	0.534469	5.220*10^-12	5.22e-12	postive
HNRNPL	MACF1-1881-ES	-0.552681	6.860*10^-13	6.86e-13	negative
DDX17	HAT1-55960-AT	-0.505443	1.040*10^-10	1.04e-10	negative
DDX17	ERCC5-26230-RI	0.514679	4.130*10^-11	4.13e-11	postive
DDX17	NAA38-81579-RI	0.610167	4.730*10^-16	4.73e-16	postive
DDX17	UBE2C-59609-RI	0.524968	1.430*10^-11	1.43e-11	postive
DDX17	ARHGEF4-55357-RI	0.575256	4.660*10^-14	4.66e-14	postive
DDX17	GABARAPL1-20353-AT	-0.544148	1.800*10^-12	1.8e-12	negative
DDX17	RPS27L-31015-AT	-0.521714	2.010*10^-11	2.01e-11	negative
DDX17	RPS27L-31016-AT	0.521699	2.010*10^-11	2.01e-11	postive
DDX17	CD276-31611-AT	-0.592259	5.340*10^-15	5.34e-15	negative
DDX17	ZNF83-51506-ES	0.512779	5.010*10^-11	5.01e-11	postive
DDX17	PABPN1-26731-RI	0.59603	3.240*10^-15	3.24e-15	postive
DDX17	HEXA-31540-AT	-0.70703	4.040*10^-23	4.04e-23	negative
DDX17	ANKS3-33795-AT	-0.556623	4.350*10^-13	4.35e-13	negative
DDX17	ANKS3-33799-AT	0.556644	4.340*10^-13	4.34e-13	postive
DDX17	RANBP1-61138-RI	0.568037	1.130*10^-13	1.13e-13	postive
DDX17	NSUN5-79935-RI	0.518097	2.920*10^-11	2.92e-11	postive
DDX17	RNF146-77446-AT	-0.629538	2.880*10^-17	2.88e-17	negative
DDX17	KRBOX4-88888-AT	0.502857	1.340*10^-10	1.34e-10	postive
DDX17	HSPB11-3097-AT	-0.613923	2.790*10^-16	2.79e-16	negative
DDX17	TMEM138-16186-AT	-0.588837	8.340*10^-15	8.34e-15	negative
DDX17	TMEM138-16187-AT	0.588837	8.340*10^-15	8.34e-15	postive
DDX17	KRBOX4-88886-AT	-0.515374	3.850*10^-11	3.85e-11	negative
DDX17	REPS1-77951-AA	0.507922	8.130*10^-11	8.13e-11	postive
DDX17	TMEM161B-72738-RI	0.584306	1.490*10^-14	1.49e-14	postive
RBMX	FAM13A-69905-AT	0.547883	1.190*10^-12	1.19e-12	postive
RBMX	FAM13A-69906-AT	-0.524973	1.430*10^-11	1.43e-11	negative
RBMX	TOR2A-87658-ES	-0.518973	2.670*10^-11	2.67e-11	negative
RBMX	KLHL7-78947-AP	0.50756	8.430*10^-11	8.43e-11	postive
RBMX	KLHL7-78948-AP	-0.507596	8.400*10^-11	8.4e-11	negative
RBMX	PPP2R5C-29314-AP	0.512112	5.360*10^-11	5.36e-11	postive
RBMX	PPP2R5C-29313-AP	-0.512106	5.360*10^-11	5.36e-11	negative
RBMX	MAD2L2-665-ES	-0.561172	2.560*10^-13	2.56e-13	negative
RBMX	TNK2-68201-AP	0.501363	1.550*10^-10	1.55e-10	postive
RBMX	TCF12-30783-AP	0.501923	1.470*10^-10	1.47e-10	postive
PRPF39	C11orf49-15610-RI	0.500893	1.620*10^-10	1.62e-10	postive
PRPF39	SETD6-36663-AA	0.509164	7.190*10^-11	7.19e-11	postive
PRPF39	NAA38-81579-RI	0.688595	1.460*10^-21	1.46e-21	postive
PRPF39	ARHGEF4-55357-RI	0.564777	1.670*10^-13	1.67e-13	postive
PRPF39	WHSC1L1-83392-AT	0.533627	5.710*10^-12	5.71e-12	postive
PRPF39	WHSC1L1-83393-AT	-0.533627	5.710*10^-12	5.71e-12	negative
PRPF39	CCDC74B-55277-RI	0.557523	3.920*10^-13	3.92e-13	postive
PRPF39	RPS27L-31015-AT	-0.649866	1.220*10^-18	1.22e-18	negative
PRPF39	RPS27L-31016-AT	0.649869	1.220*10^-18	1.22e-18	postive
PRPF39	CD276-31611-AT	-0.577162	3.680*10^-14	3.68e-14	negative
PRPF39	HSD17B7-8754-AT	0.501781	1.490*10^-10	1.49e-10	postive
PRPF39	PABPN1-26731-RI	0.702027	1.100*10^-22	1.1e-22	postive
PRPF39	SLC37A3-81987-AA	0.545722	1.510*10^-12	1.51e-12	postive
PRPF39	HEXA-31540-AT	-0.655478	4.900*10^-19	4.9e-19	negative
PRPF39	SENP6-76795-ES	-0.507411	8.560*10^-11	8.56e-11	negative
PRPF39	ANKS3-33795-AT	-0.573161	6.030*10^-14	6.03e-14	negative
PRPF39	ANKS3-33799-AT	0.573137	6.050*10^-14	6.05e-14	postive
PRPF39	RANBP1-61138-RI	0.604695	1.010*10^-15	1.01e-15	postive
PRPF39	HSD17B7-8753-AT	-0.522877	1.780*10^-11	1.78e-11	negative
PRPF39	NSUN5-79935-RI	0.644657	2.810*10^-18	2.81e-18	postive
PRPF39	RNF146-77446-AT	-0.607983	6.410*10^-16	6.41e-16	negative
PRPF39	UNC119-39915-RI	0.535215	4.810*10^-12	4.81e-12	postive
PRPF39	LUC7L-32848-ES	0.535962	4.440*10^-12	4.44e-12	postive
PRPF39	FLAD1-91160-ES	0.532587	6.390*10^-12	6.39e-12	postive
PRPF39	TMEM138-16186-AT	-0.5669	1.290*10^-13	1.29e-13	negative
PRPF39	TMEM138-16187-AT	0.56691	1.290*10^-13	1.29e-13	postive
PRPF39	TMEM161B-72738-RI	0.530663	7.850*10^-12	7.85e-12	postive
PRPF39	CXorf38-88839-AA	0.515832	3.680*10^-11	3.68e-11	postive
INTS7	TOR2A-87658-ES	-0.516159	3.560*10^-11	3.56e-11	negative
INTS7	KLHL7-78947-AP	0.507092	8.830*10^-11	8.83e-11	postive
INTS7	KLHL7-78948-AP	-0.507099	8.820*10^-11	8.82e-11	negative
INTS7	PPP2R5C-29314-AP	0.524241	1.550*10^-11	1.55e-11	postive
INTS7	PPP2R5C-29313-AP	-0.524236	1.550*10^-11	1.55e-11	negative
MYEF2	MRPS21-7461-AP	0.525489	1.360*10^-11	1.36e-11	postive
MYEF2	MRPS21-7460-AP	-0.525497	1.360*10^-11	1.36e-11	negative
MYEF2	CHMP2A-52482-AP	0.514035	4.410*10^-11	4.41e-11	postive
MYEF2	TNFSF12-38966-AT	-0.607132	7.210*10^-16	7.21e-16	negative
MYEF2	TNFSF12-38967-AT	0.607132	7.210*10^-16	7.21e-16	postive
MYEF2	BCCIP-13431-AT	-0.548317	1.130*10^-12	1.13e-12	negative
MYEF2	MSL1-40842-AT	-0.50023	1.730*10^-10	1.73e-10	negative
MYEF2	MSL1-40843-AT	0.50023	1.730*10^-10	1.73e-10	postive
MYEF2	ZNF333-48020-AT	0.588838	8.340*10^-15	8.34e-15	postive
MYEF2	WHSC1L1-83392-AT	0.570193	8.670*10^-14	8.67e-14	postive
MYEF2	WHSC1L1-83393-AT	-0.570193	8.670*10^-14	8.67e-14	negative
MYEF2	LMF1-33029-AP	0.542509	2.160*10^-12	2.16e-12	postive
MYEF2	LMF1-33028-AP	-0.542509	2.160*10^-12	2.16e-12	negative
MYEF2	CPSF4-80635-AA	0.540492	2.700*10^-12	2.7e-12	postive
MYEF2	ZNF333-48017-AT	-0.668129	5.800*10^-20	5.8e-20	negative
MYEF2	PDCD5-48878-AP	-0.561135	2.570*10^-13	2.57e-13	negative
MYEF2	PDCD5-48877-AP	0.561135	2.570*10^-13	2.57e-13	postive
MYEF2	ZDHHC7-37873-ES	-0.529933	8.480*10^-12	8.48e-12	negative
MYEF2	HSD17B7-8754-AT	0.501487	1.530*10^-10	1.53e-10	postive
MYEF2	GCHFR-30032-AT	-0.719938	2.760*10^-24	2.76e-24	negative
MYEF2	GCHFR-30033-AT	0.719938	2.760*10^-24	2.76e-24	postive
MYEF2	PIK3R2-48398-AT	-0.549136	1.030*10^-12	1.03e-12	negative
MYEF2	PIK3R2-48396-AT	0.549137	1.030*10^-12	1.03e-12	postive
MYEF2	HEXA-31540-AT	-0.622364	8.300*10^-17	8.3e-17	negative
MYEF2	ANKS3-33795-AT	-0.516073	3.590*10^-11	3.59e-11	negative
MYEF2	ANKS3-33799-AT	0.516049	3.600*10^-11	3.6e-11	postive
MYEF2	MAPK1-61256-AT	0.501135	1.580*10^-10	1.58e-10	postive
MYEF2	MAPK1-61257-AT	-0.501142	1.580*10^-10	1.58e-10	negative
MYEF2	GCHFR-30029-AP	-0.668031	5.900*10^-20	5.9e-20	negative
MYEF2	GCHFR-30031-AP	0.661633	1.760*10^-19	1.76e-19	postive
MYEF2	HSD17B7-8753-AT	-0.519836	2.440*10^-11	2.44e-11	negative
MYEF2	RNF146-77446-AT	-0.503083	1.310*10^-10	1.31e-10	negative
MYEF2	PPCS-2072-AP	-0.542068	2.270*10^-12	2.27e-12	negative
MYEF2	PPCS-2071-AP	0.542054	2.270*10^-12	2.27e-12	postive
MYEF2	TMEM138-16186-AT	-0.51892	2.680*10^-11	2.68e-11	negative
MYEF2	TMEM138-16187-AT	0.518927	2.680*10^-11	2.68e-11	postive
MYEF2	KIF13A-75455-AT	-0.526704	1.190*10^-11	1.19e-11	negative
MYEF2	GK-88735-ES	0.59319	4.720*10^-15	4.72e-15	postive
MYEF2	ANTXR1-53845-AT	0.513606	4.610*10^-11	4.61e-11	postive
MYEF2	TMEM161B-72738-RI	0.539137	3.140*10^-12	3.14e-12	postive
MYEF2	ANTXR1-53844-AT	-0.510245	6.460*10^-11	6.46e-11	negative
MYEF2	AKAP11-25751-ES	0.505	1.080*10^-10	1.08e-10	postive
SRSF11	SETD6-36663-AA	0.509484	6.960*10^-11	6.96e-11	postive
SRSF11	NAA38-81579-RI	0.610168	4.730*10^-16	4.73e-16	postive
SRSF11	CHMP2A-52482-AP	0.510924	6.030*10^-11	6.03e-11	postive
SRSF11	ARHGEF4-55357-RI	0.559056	3.280*10^-13	3.28e-13	postive
SRSF11	WHSC1L1-83392-AT	0.502455	1.390*10^-10	1.39e-10	postive
SRSF11	WHSC1L1-83393-AT	-0.502455	1.390*10^-10	1.39e-10	negative
SRSF11	CCDC74B-55277-RI	0.515201	3.920*10^-11	3.92e-11	postive
SRSF11	RPS27L-31015-AT	-0.612648	3.340*10^-16	3.34e-16	negative
SRSF11	RPS27L-31016-AT	0.61266	3.330*10^-16	3.33e-16	postive
SRSF11	CD276-31611-AT	-0.598632	2.290*10^-15	2.29e-15	negative
SRSF11	ZNF83-51506-ES	0.513683	4.570*10^-11	4.57e-11	postive
SRSF11	PABPN1-26731-RI	0.574237	5.280*10^-14	5.28e-14	postive
SRSF11	SLC37A3-81987-AA	0.572807	6.300*10^-14	6.3e-14	postive
SRSF11	HEXA-31540-AT	-0.696208	3.430*10^-22	3.43e-22	negative
SRSF11	DNASE1L1-90573-AP	0.502795	1.350*10^-10	1.35e-10	postive
SRSF11	ANKS3-33795-AT	-0.51406	4.400*10^-11	4.4e-11	negative
SRSF11	ANKS3-33799-AT	0.514023	4.420*10^-11	4.42e-11	postive
SRSF11	RANBP1-61138-RI	0.589333	7.820*10^-15	7.82e-15	postive
SRSF11	HSD17B7-8753-AT	-0.51602	3.610*10^-11	3.61e-11	negative
SRSF11	NSUN5-79935-RI	0.657039	3.790*10^-19	3.79e-19	postive
SRSF11	RNF146-77446-AT	-0.563123	2.030*10^-13	2.03e-13	negative
SRSF11	LUC7L-32848-ES	0.557324	4.010*10^-13	4.01e-13	postive
SRSF11	HSPB11-3097-AT	-0.50441	1.150*10^-10	1.15e-10	negative
SRSF11	LETMD1-21743-ES	0.534944	4.950*10^-12	4.95e-12	postive
SRSF11	FLAD1-91160-ES	0.533833	5.590*10^-12	5.59e-12	postive
SRSF11	TMEM138-16186-AT	-0.589721	7.440*10^-15	7.44e-15	negative
SRSF11	TMEM138-16187-AT	0.58973	7.430*10^-15	7.43e-15	postive
SRSF11	TMEM161B-72738-RI	0.567789	1.160*10^-13	1.16e-13	postive
SRSF11	PSME1-26851-RI	0.5048	1.110*10^-10	1.11e-10	postive
